# Supplementary material for: Serum is not required for ex vivo IFN-γ ELISPOT: a collaborative study of different protocols from the European CIMT Immunoguiding Program
Source: Springer Nature journal article supplement (doi:10.1007/s00262-009-0814-4), 2010-01-05
Supplement: MOESM1 [file 8231068]

|             | <b>Thawing medium</b>       | <b>medium temp (°C)</b> | <b>Counting method</b> | <b>Resting time (h)</b> | <b>Preferred protocol: serum / serum-free</b> |
|-------------|-----------------------------|-------------------------|------------------------|-------------------------|-----------------------------------------------|
| <u>ID01</u> | CTL wash medium + benzonase | 37                      | Guava PCA-96 System    | 17                      | serum-free                                    |
| ID02        | PBS                         | RT                      | Trypan blue            | 3                       | serum                                         |
| ID03        | RPMI 1640 + AB serum        | 37                      | Guava PCA-96 System    | 20                      | serum                                         |
| <u>ID04</u> | X-vivo 15                   | 37                      | Trypan blue            | 21                      | serum-free                                    |
| ID05        | RPMI 1640                   | RT                      | Trypan blue            | 2                       | serum                                         |
| ID07        | Iscove + 10% AB serum       | RT                      | Trypan blue            | 2                       | serum                                         |
| ID08        | IMDM + 2.5% HS + DNase      | 37                      | Trypan blue            | 14                      | serum                                         |
| ID09        | IMDM                        | 4                       | Trypan blue            | 19                      | serum                                         |
| ID11        | RPMI 1640                   | RT                      | Trypan blue            | 6                       | serum                                         |
| ID13        | RPMI 1640                   | 37                      | Trypan blue            | 18                      | serum                                         |
| ID15        | X-vivo 15                   | 37                      | CASY Model TT Inovatis | 3                       | serum                                         |
| <u>ID16</u> | CTL wash medium + benzonase | 37                      | Trypan blue            | 3                       | serum-free                                    |
| ID19        | AIM-V                       | 37                      | Guava ViaCount         | 2                       | serum                                         |
| ID21        | RPMI 1640                   | 37                      | Trypan blue            | 18                      | serum                                         |
| ID23        | X-vivo 15                   | 37                      | Trypan blue            | 20                      | serum                                         |
| ID24        | X-vivo 15                   | 37                      | Trypan blue            | 2                       | serum                                         |

**Supplementary Table 1A: cell handling conditions.** A questionnaire was completed by each participating centre to provide details of individual protocols and reagents used in the IFN- $\gamma$  ELISPOT assay: Thawing medium and temperature, counting method, resting conditions and preferred condition. The IDs from the three labs normally using a serum-free protocols are underlined.

|                    | TEST WITH SERUM |                             | NO SERUM        | PLATES                  | ANTIBODIES                | READER                   |
|--------------------|-----------------|-----------------------------|-----------------|-------------------------|---------------------------|--------------------------|
|                    | medium          | serum                       | medium          | plate type              | Vendor                    | Reader                   |
| <b>ID01</b>        | X-vivo 15       | 10% human AB serum PAN      | X-vivo 15       | BD ELISPOT plate 551849 | Becton Dickinson          | CTL Immunospot S3        |
| <b>ID02</b>        | IMDM            | 10% human AB serum          | AIM-V           | Millipore MAIP N4550    | Mabtech                   | AID ERL02                |
| <b>ID03</b>        | IMDM            | 10% human AB serum PAA      | AIM-V           | Millipore MSIP S4W10    | Becton Dickinson          | AID ERL02                |
| <b><u>ID04</u></b> | X-vivo 15       | 5% human AB serum sigma     | X-vivo 15       | Millipore MSIP N4W      | Mabtech                   | CTL Immunospot S4        |
| <b>ID05</b>        | RPMI 1640       | 10% human AB serum          | X-vivo 15       | Millipore MSIP S4       | Mabtech                   | CTL Immunospot S2        |
| <b>ID07</b>        | Iscove          | 10% human AB serum PAN      | X-vivo 15       | Millipore MAHA S4510    | Pharmingen                | BioSys 3000              |
| <b>ID08</b>        | IMDM            | 10% human AB serum CCpro    | X-vivo 15       | Millipore MSIP N4B50    | Mabtech                   | CTL Immunospot S5        |
| <b>ID09</b>        | IMDM            | 10%human AB serum PAA       | X-vivo 15       | Millipore MSHA S4510    | Mabtech                   | BioSys 5000              |
| <b>ID11</b>        | RPMI 1640       | 10% human AB serum LONZA    | X-vivo 15       | Millipore MAIP S4510    | Mabtech                   | AID ELR02                |
| <b>ID13</b>        | RPMI 1640       | 10% human AB serum          | X-vivo 15       | Millipore MSIP S45      | Mabtech                   | CTL Immunospot S2        |
| <b>ID15</b>        | RPMI 1640       | 5% human poolserum          | X-vivo 15       | Millipore MSIP S45      | Mabtech pre-coated plates | Zeiss ELISPOT reader 4.1 |
| <b><u>ID16</u></b> | RPMI 1640       | 10% human AB serum BioWhit. | CTL-test medium | Millipore MSIP S45      | Mabtech pre-coated plates | AID ELR03                |
| <b>ID19</b>        | RPMI 1640       | 10% FBS Gibco Invitrogen    | AIM-V           | Millipore MSIP S4W      | Mabtech pre-coated plates | AID ELR04                |
| <b>ID21</b>        | RPMI 1640       | 10% human AB serum          | X-vivo 15       | Millipore MSIP S4510    | Mabtech                   | A EL VIS Eli Scan V2.0   |
| <b>ID23</b>        | X-vivo 15       | 10% human AB serum          | X-Vivo 15       | Millipore MSIP S45      | Mabtech pre-coated plates | CTL Immunospot S4        |
| <b>ID24</b>        | X-vivo 15       | 5% human AB serum CCpro     | X-vivo 15       | BD ELISPOT plate 512447 | Becton Dickinson          | Zeiss ELISPOT reader 4.4 |

**Supplementary Table 1B: Results from questionnaires (ELISPOT conditions).** A questionnaire was completed by each participating centre to provide details of individual protocols and reagents used in the IFN- $\gamma$  ELISPOT assay: Test media (with serum and serum-free), type of plates, antibody vendor and ELISPOT reader. The IDs from the three labs normally using a serum-free protocols are underlined.

|             | D1 / CMV |          | D2 / Flu |          | D2 / CMV |          | D3 / Flu |          | D3 / CMV |          | D4 / Flu |          | D5 / Flu |          |
|-------------|----------|----------|----------|----------|----------|----------|----------|----------|----------|----------|----------|----------|----------|----------|
|             | serum    | no serum |
| <b>ID01</b> | 7        | 6        | 20       | 24       | P + BG   | P + BG   | 28       | 21       | 124      | 116      | 4        | 5        | 33       | 24       |
| <b>ID02</b> | BG       | n.d.     | P        | 3        | P        | P + BG   | P        | n.d.     | 41       | n.d.     | P        | P        | 12       | P + BG   |
| <b>ID03</b> | 4        | BG       | 9        | BG       | BG       | 8        | BG       | BG       | 76       | 7        | 2        | BG       | 4        | 4        |
| <b>ID04</b> | 6        | 8        | 24       | 51       | 2        | 2        | 20       | 16       | P + BG   | P + BG   | 3        | P        | 33       | 17       |
| <b>ID05</b> | BG       | P + BG   | P + BG   | P + BG   | BG       | P + BG   | P + BG   | P + BG   | P + BG   | BG       | P + BG   | P + BG   | P + BG   | P + BG   |
| <b>ID07</b> | 11       | BG       | 25       | 20       | 13       | P + BG   | 23       | P        | 116      | 98       | BG       | BG       | 41       | 36       |
| <b>ID08</b> | P + BG   | 7        | BG       | 15       | P + BG   | P + BG   | BG       | 21       | 115      | 111      | P + BG   | 3        | BG       | 23       |
| <b>ID09</b> | 18       | n.d.     | 36       | 42       | BG       | 9        | 38       | 37       | 128      | 148      | 12       | 6        | 53       | n.d.     |
| <b>ID11</b> | 8        | BG       | 26       | 17       | 2        | P + BG   | 15       | 24       | 74       | 123      | P        | BG       | 29       | 26       |
| <b>ID13</b> | 6        | P + BG   | 12       | P + BG   | P        | P + BG   | 8        | P + BG   | 64       | BG       | 2        | P + BG   | n.d.     | n.d.     |
| <b>ID15</b> | 4        | 4        | 19       | 24       | 1        | P        | 10       | 8        | 109      | 103      | 2        | 3        | 8        | 9        |
| <b>ID16</b> | P + BG   | BG       | BG       | 38       | P + BG   | P + BG   | BG       | 34       | 190      | 184      | BG       | P + BG   | 41       | 48       |
| <b>ID19</b> | 10       | n.d.     | 40       | 31       | 4        | P + BG   | 31       | n.d.     | 153      | n.d.     | 7        | BG       | 36       | n.d.     |
| <b>ID21</b> | 7        | n.d.     | 14       | 15       | P + BG   | P + BG   | 11       | n.d.     | 55       | n.d.     | P + BG   | 2        | 3        | n.d.     |
| <b>ID23</b> | P + BG   | BG       | BG       | BG       | 66       | 79       | BG       | BG       | 63       | 83       | BG       | 10       | 9        | P + BG   |
| <b>ID24</b> | P + BG   | P        | 16       | P        | P + BG   | P + BG   | BG       | 12       | 89       | 106      | 16       | 10       | n.d.     | n.d.     |

**Supplementary Table 2A: Overview of specific spot counts.** The reported frequencies of antigen-specific T-cells, expressed as spots per 100,000 PBMC, are shown for all 16 centres that submitted complete data sets for the seven donor-antigen combinations where antigen-specific T cells were present in detectable numbers (D1/CMV, D2/Flu, D2/CMV, D3/Flu, D3/CMV, D4/Flu, D5/Flu). For each donor-antigen combination the results are shown for test with serum and without serum. Where insufficient cells were recovered to perform the test in triplicate the results were eliminated from further analysis (not done, n.d.). A two-sided T-test for unpaired samples was performed on all triplicates to eliminate variability through inconsistent seeding; triplicates with p-value of >0.05 are indicated in the table as (P). Antigen-specific spots were determined where the number of spots provided by PBMC plus antigen were >3-fold of the medium only background; triplicates that were <3-fold background are indicated as (BG).

|                                                                                        |  | D1 / CMV |          | D2 / Flu |          | D2 / CMV |          | D3 / Flu |          | D3 / CMV |          | D4 / Flu |          | D5 / Flu |          |
|----------------------------------------------------------------------------------------|--|----------|----------|----------|----------|----------|----------|----------|----------|----------|----------|----------|----------|----------|----------|
|                                                                                        |  | serum    | no serum |
| <b>detected by</b><br><b>from</b><br><b>%</b><br><b>mean</b><br><b>SD</b><br><b>CV</b> |  | 10       | 4        | 11       | 11       | 5        | 4        | 9        | 8        | 14       | 10       | 8        | 7        | 12       | 8        |
|                                                                                        |  | 16       | 12       | 16       | 16       | 16       | 16       | 16       | 13       | 16       | 13       | 16       | 16       | 14       | 11       |
|                                                                                        |  | 63       | 33       | 69       | 69       | 31       | 25       | 56       | 62       | 88       | 77       | 50       | 44       | 86       | 73       |
|                                                                                        |  | 8        | 6        | 22       | 25       | 15       | 24       | 20       | 21       | 100      | 108      | 6        | 5        | 25       | 23       |
|                                                                                        |  | 4        | 2        | 11       | 14       | 26       | 36       | 10       | 10       | 42       | 45       | 5        | 3        | 17       | 14       |
|                                                                                        |  | 50.53    | 23.93    | 49.12    | 54.42    | 175.78   | 148.66   | 51.58    | 46.71    | 41.70    | 42.13    | 89.83    | 61.33    | 67.76    | 61.27    |

**Supplementary Table 2B: Overview of specific spot counts.**

The table gives a summary of the group results (all 16 participants shown in suppl. Table 2A) for the seven reactive donor-antigen combinations (D1/CMV, D2/Flu, D2/CMV, D3/Flu, D3/CMV, D4/Flu, D5/Flu). For each donor-antigen combination the group results are shown for test with serum and without serum. The table shows the number of centres that were successfully able to detect a response (first row), the number of tests performed (second row), the percentage of centres that were able to successfully detect a response (third row), the mean frequency of antigen-specific T cells (fourth row), the standard deviation of reported frequency of antigen-specific T cells (fifth row) and the coefficient of variation as calculated from all positive responses (sixth row).
